# Supplementary material for: Effects of Anemoside B4 on Plasma Metabolites in Cows with Clinical Mastitis
Source: MDPI journal article supplement (doi:10.3390/vetsci10070437), 2023-07-05

**Table S1.** Composition of the diets for cows

| Items                  | Lactation |
|------------------------|-----------|
| Ingredient, % of DM    |           |
| Alfalfa hay            | 22.63     |
| Corn silage            | 16.52     |
| Steam-flaked corn      | 20.14     |
| Brewer's grain         | 5.51      |
| Soybean meal           | 4.86      |
| Extruded-soybean       | 7.54      |
| Wheat bran             | 4.88      |
| Cottonseed             | 10.19     |
| Fat powder             | 0.99      |
| Premix <sup>1</sup>    | 0.60      |
| Calcium hydrophosphate | 1.49      |
| Calcium powder         | 0.59      |
| NaCO <sub>3</sub>      | 0.79      |
| NaCl                   | 0.74      |
| Molasses               | 2.53      |
| Total                  | 100       |

Chemical composition, % of DM unless  
noted

|                    |       |
|--------------------|-------|
| DM                 | 50.36 |
| CP                 | 18.14 |
| NDF                | 30.3  |
| ADF                | 20.68 |
| Ca                 | 1.03  |
| P                  | 0.69  |
| NEL, Mcal/kg of DM | 1.71  |

---

<sup>1</sup>Formulated to contain (per kilogram of premix) 1100 KIU vitamin A, 360 KIU of vitamin D3, 6500 IU of vitamin E, 2525 mg CU, 4200 mg Mn, 10025 mg Zn, 4150 mg Fe, 60 mg Co, 200 mg of biotin, and ≤ 10% water.

**Table S2.** Differential metabolites identified of CM-0 vs Healthy cows in the positive or negative mode

| No. | Ions mode | Adduct                      | Metabolite         | VIP  | Fold change | $-\log(p)$ | $m/z$  | RT(s)  |
|-----|-----------|-----------------------------|--------------------|------|-------------|------------|--------|--------|
| 1   | ESI+      | (M+H) +                     | L-Citrulline       | 4.79 | 0.61        | 4.05       | 176.10 | 767.28 |
| 2   | ESI+      | (M+H-2H <sub>2</sub> O) +   | Glycocholic acid   | 2.21 | 3.00        | 3.22       | 430.29 | 65.86  |
| 3   | ESI+      | (M+H) +                     | L-Kynurenine       | 1.81 | 0.52        | 3.04       | 209.09 | 516.58 |
| 4   | ESI+      | (M+H) +                     | PC(18:0/18:1)      | 3.76 | 1.86        | 2.24       | 788.61 | 76.47  |
| 5   | ESI+      | (M+H) +                     | N6-methyladenosine | 1.06 | 2.75        | 1.97       | 282.12 | 241.95 |
| 6   | ESI+      | (M+H) +                     | L-Glutamine        | 3.62 | 0.68        | 1.97       | 147.08 | 730.46 |
| 7   | ESI+      | (M+H) +                     | Uridine            | 2.17 | 0.70        | 1.80       | 245.08 | 309.45 |
| 8   | ESI+      | (M-H+2Na) +                 | Thioetheramide-PC  | 1.90 | 0.82        | 1.63       | 780.55 | 75.93  |
| 9   | ESI+      | (M+CH <sub>3</sub> CN+Na) + | Gly-Arg            | 1.36 | 2.01        | 1.62       | 295.15 | 903.59 |
| 10  | ESI+      | (M+H) +                     | LysoPC(14:0)       | 4.04 | 0.68        | 1.59       | 468.31 | 391.32 |
| 11  | ESI+      | (M+H) +                     | Uracil             | 2.76 | 0.71        | 1.55       | 113.03 | 309.58 |

|    |      |                            |                                       |      |      |      |        |        |
|----|------|----------------------------|---------------------------------------|------|------|------|--------|--------|
| 12 | ESI+ | (M+H) +                    | 1-Aminocyclohexanecarboxylic acid     | 2.36 | 0.35 | 1.53 | 144.10 | 553.28 |
| 13 | ESI+ | (M+CH <sub>3</sub> CN+H) + | Lys-Cys                               | 1.13 | 2.24 | 1.50 | 291.15 | 922.06 |
| 14 | ESI+ | M+                         | Choline                               | 1.75 | 1.39 | 1.50 | 104.11 | 521.61 |
| 15 | ESI+ | M+                         | trimethylammonium cation              | 1.76 | 1.21 | 1.47 | 146.12 | 737.54 |
| 16 | ESI+ | (M+H) +                    | 2-Thiocytidine                        | 1.75 | 0.85 | 1.46 | 260.07 | 337.57 |
| 17 | ESI+ | (M+H) +                    | Triethanolamine                       | 2.26 | 0.26 | 1.46 | 150.11 | 267.54 |
| 18 | ESI+ | (M+H) +                    | D-Lactose                             | 2.64 | 1.75 | 1.43 | 343.12 | 785.64 |
| 19 | ESI+ | (M+H) +                    | L-Histidine                           | 2.11 | 0.73 | 1.36 | 156.08 | 849.21 |
| 20 | ESI+ | (M+H) +                    | L-Tryptophan                          | 3.12 | 0.83 | 1.35 | 205.10 | 511.08 |
| 21 | ESI+ | (M+H) +                    | Phthalic acid Mono-2-ethylhexyl Ester | 2.63 | 1.41 | 1.32 | 279.16 | 30.27  |
| 22 | ESI- | (M-H) -                    | Norethindrone Acetate                 | 1.74 | 0.49 | 2.78 | 339.20 | 67.99  |
| 23 | ESI- | (M-H) -                    | Thymine                               | 2.08 | 0.61 | 2.69 | 125.03 | 168.38 |
| 24 | ESI- | (M-H) -                    | Phenol                                | 2.07 | 0.34 | 2.32 | 93.03  | 58.09  |

|    |      |             |                      |      |      |      |        |        |
|----|------|-------------|----------------------|------|------|------|--------|--------|
| 25 | ESI- | (M-H) -     | Salicyluric acid     | 3.55 | 0.42 | 2.19 | 194.05 | 242.80 |
| 26 | ESI- | (M-H) -     | Salicylic acid       | 5.34 | 0.34 | 2.14 | 137.02 | 58.20  |
| 27 | ESI- | (M-H) -     | L-Valine             | 3.88 | 0.67 | 2.03 | 116.07 | 529.08 |
| 28 | ESI- | (M-H) -     | Oleic acid           | 4.49 | 2.37 | 1.96 | 281.25 | 81.15  |
| 29 | ESI- | (M-H) -     | Adynerin             | 1.30 | 0.63 | 1.96 | 515.30 | 66.01  |
| 30 | ESI- | (M-H) -     | L-Threonine          | 1.75 | 0.51 | 1.85 | 118.05 | 632.25 |
| 31 | ESI- | (M-H) -     | DL-lactate           | 4.01 | 1.64 | 1.80 | 89.02  | 393.88 |
| 32 | ESI- | (M-H) -     | PGF3a                | 1.03 | 1.49 | 1.78 | 351.22 | 166.98 |
| 33 | ESI- | (M+Na-2H) - | Stavudine            | 1.11 | 2.63 | 1.75 | 245.05 | 533.66 |
| 34 | ESI- | (M-H) -     | Thymidine            | 2.71 | 0.68 | 1.69 | 241.08 | 168.31 |
| 35 | ESI- | (M-H) -     | Phenylacetyl glycine | 2.48 | 0.65 | 1.66 | 192.07 | 320.92 |
| 36 | ESI- | (M-H) -     | Pelargonic acid      | 2.33 | 1.37 | 1.66 | 157.12 | 74.86  |
| 37 | ESI- | (M-H) -     | 20-HETE              | 1.32 | 2.63 | 1.44 | 319.23 | 44.04  |

|    |      |         |                     |      |      |      |        |        |
|----|------|---------|---------------------|------|------|------|--------|--------|
| 38 | ESI- | (M-H) - | Allantoin           | 4.76 | 0.91 | 1.43 | 157.04 | 314.03 |
| 39 | ESI- | (M-H) - | L-Pyroglutamic acid | 4.37 | 1.31 | 1.42 | 128.03 | 533.48 |
| 40 | ESI- | (M-H) - | Dihydrothymine      | 1.20 | 0.69 | 1.34 | 127.05 | 671.11 |
| 41 | ESI- | (M-H) - | Protocatechuie acid | 4.18 | 0.50 | 1.31 | 153.02 | 38.91  |

Notes: ESI + was positive ion model, ESI- was negative ion model. Log(*p*) indicated the logarithmic function of *p* -value based on 10. -Log<sub>10</sub> (0.05) = 1.3. *m/z* = mass-to-charge ratio; RT = retention time; VIP = variable importance in projection. The same below.

**Table S3.** Differential metabolites identified of CM-3 vs CM-0 cows in the positive or negative mode

| No. | Ions mode | Adduct      | Metabolite        | VIP  | Fold change | -Log ( <i>p</i> ) | <i>m/z</i> | RT(s)  |
|-----|-----------|-------------|-------------------|------|-------------|-------------------|------------|--------|
| 1   | ESI+      | (M+H) +     | PC (16:0/16:0)    | 1.59 | 0.54        | 3.00              | 734.56     | 309.22 |
| 2   | ESI+      | (M-H+2Na) + | Thioetheramide-PC | 3.31 | 1.42        | 2.58              | 780.55     | 75.93  |
| 3   | ESI+      | (M+H) +     | Creatinine        | 7.59 | 1.17        | 2.09              | 114.07     | 324.52 |
| 4   | ESI+      | (M+Na) +    | LysoPC (18:1)     | 6.15 | 1.67        | 2.08              | 544.34     | 387.74 |
| 5   | ESI+      | (M+H) +     | LysoPC (14:0)     | 4.44 | 1.68        | 1.91              | 468.31     | 391.32 |

|    |      |                            |                        |      |      |      |        |         |
|----|------|----------------------------|------------------------|------|------|------|--------|---------|
| 6  | ESI+ | (M+Na) +                   | PC(18:0/18:1)          | 5.17 | 0.58 | 1.89 | 810.60 | 296.67  |
| 7  | ESI+ | (M+Na) +                   | LysoPC (18:0)          | 6.22 | 1.46 | 1.85 | 546.35 | 388.92  |
| 8  | ESI+ | (M+CH <sub>3</sub> CN+H) + | cis-9-Palmitoleic acid | 4.91 | 2.13 | 1.58 | 296.26 | 55.65   |
| 9  | ESI+ | (M+H) +                    | N6-Methyl-L-lysine     | 1.81 | 0.62 | 1.41 | 161.13 | 1050.97 |
| 10 | ESI+ | (M+H) +                    | Phosphorylcholine      | 3.19 | 0.52 | 1.39 | 184.07 | 303.42  |
| 11 | ESI+ | (M+H-H <sub>2</sub> O) +   | PC(18:1/18:1)          | 3.02 | 0.62 | 1.35 | 768.59 | 296.75  |
| 12 | ESI+ | M+                         | Glycerophosphocholine  | 2.53 | 0.77 | 1.32 | 258.11 | 757.52  |
| 13 | ESI+ | (M+H) +                    | Stearoylcarnitine      | 1.53 | 1.97 | 1.32 | 428.37 | 311.70  |
| 14 | ESI- | (M-H) -                    | Isobutyric acid        | 1.24 | 0.25 | 2.02 | 87.04  | 226.63  |
| 15 | ESI- | (M-H <sub>2</sub> O-H) -   | 15-keto-PGE1           | 2.48 | 2.02 | 1.78 | 333.21 | 219.61  |
| 16 | ESI- | (M-H) -                    | Linoleic acid          | 1.12 | 0.63 | 1.68 | 279.23 | 168.91  |
| 17 | ESI- | (M-H) -                    | Uridine                | 2.94 | 0.67 | 1.68 | 243.06 | 275.21  |
| 18 | ESI- | (M-H) -                    | Salicyluric acid       | 2.04 | 0.20 | 1.58 | 194.05 | 242.80  |

|    |      |         |                       |      |      |      |        |       |
|----|------|---------|-----------------------|------|------|------|--------|-------|
| 19 | ESI- | (M-H) - | Ginkgolic Acid        | 2.52 | 2.72 | 1.41 | 345.24 | 38.30 |
| 20 | ESI- | (M-H) - | Eicosapentaenoic acid | 2.74 | 0.66 | 1.35 | 301.22 | 64.52 |

---



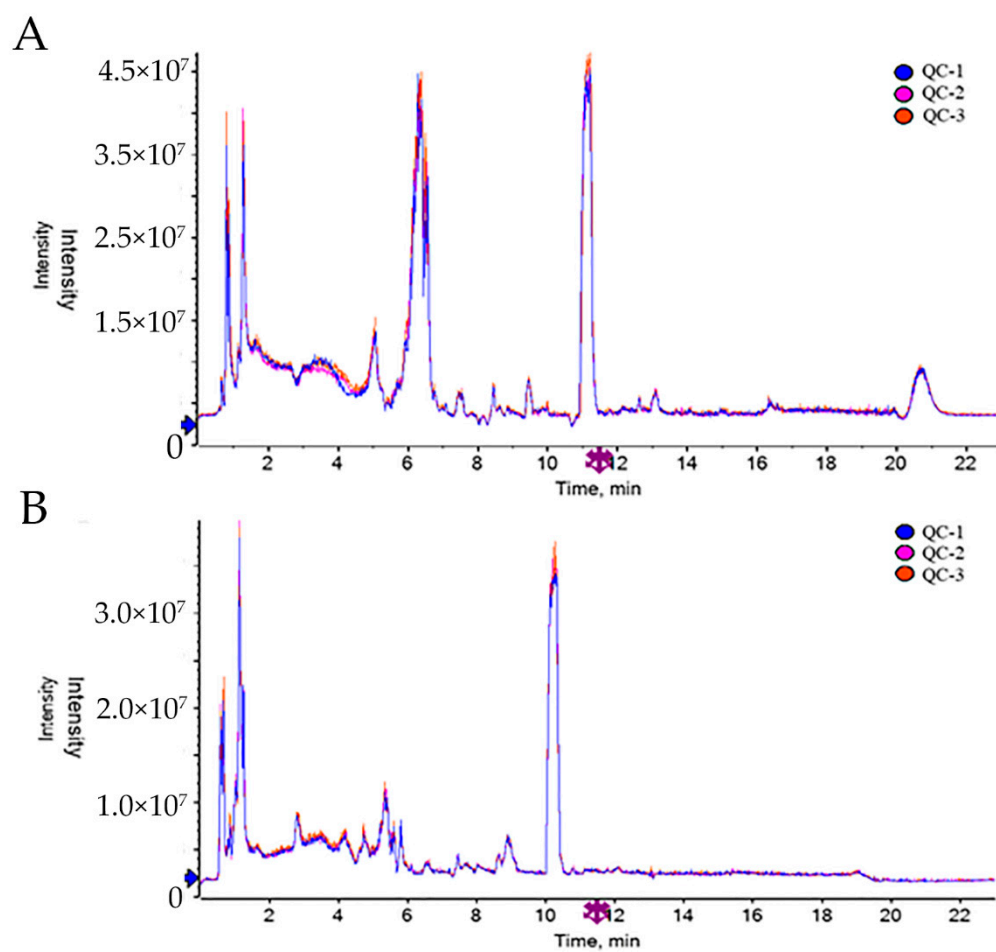

**Figure S1.** The total ion chromatograms (TIC) plot in (A) positive and (B) negative ion mode.

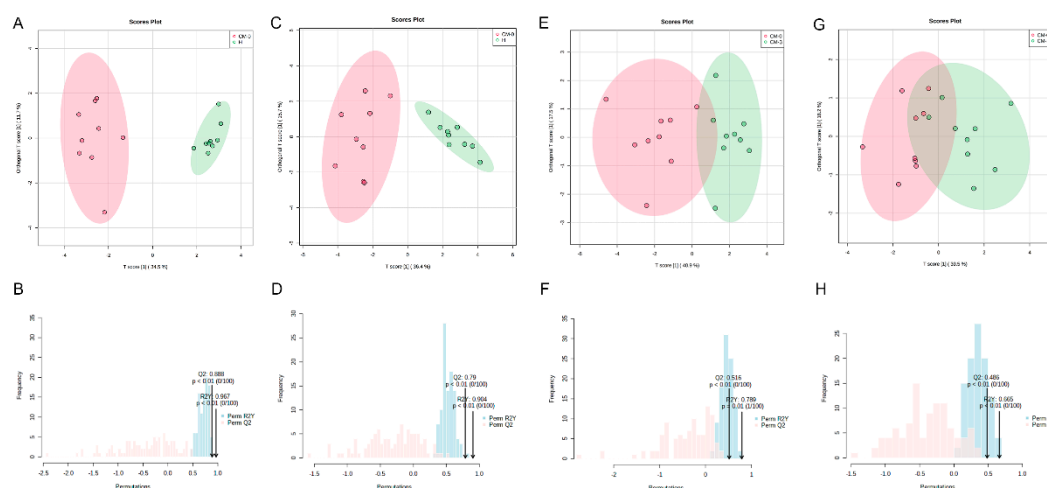

Supplement: s1 [file s1]
